1 **Spectral sensitivity in Onychophora (velvet worms)**  
2 **revealed by electroretinograms, phototactic**  
3 **behaviour and opsin gene expression**

4  
5 Holger Beckmann<sup>1,2\*</sup>, Lars Hering<sup>1</sup>, Miriam J. Henze<sup>3</sup>, Almut Kelber<sup>3</sup>, Paul A.  
6 Stevenson<sup>4</sup> and Georg Mayer<sup>1</sup>

7  
8 <sup>1</sup>Animal Evolution and Development, Institute of Biology, University of Leipzig,  
9 Talstrasse 33, D-04103 Leipzig, Germany

10 <sup>2</sup>Rudolf-Boehm-Institute of Pharmacology and Toxicology, University of Leipzig,  
11 Haertelstrasse 16-18, D-04107 Leipzig, Germany

12 <sup>3</sup>Department of Biology, Lund University, Sölvegatan 35, 22362, Lund, Sweden

13 <sup>4</sup>Animal Physiology, Institute of Biology, University of Leipzig, Talstraße 33, D-04103  
14 Leipzig, Germany

15  
16 \*Author for correspondence: Rudolf-Boehm-Institute of Pharmacology and Toxicology,  
17 University of Leipzig, Haertelstrasse 16-18, D-04107 Leipzig, Germany  
18 (holger.beckmann@medizin.uni-leipzig.de)

19  
20 Manuscript type: Research article

21  
22 Short title: Spectral Sensitivity in Onychophora

23 **ABSTRACT**

24 Onychophorans typically possess a pair of simple eyes, inherited from the last common  
25 ancestor of Panarthropoda (Onychophora + Tardigrada + Arthropoda). These visual  
26 organs are thought to be homologous to the arthropod median ocelli, whereas the  
27 compound eyes most likely evolved in the arthropod lineage. To gain insights into the  
28 ancestral function and evolution of the visual system in panarthropods, we investigated  
29 phototactic behaviour, opsin gene expression and the spectral sensitivity of the eyes in  
30 two representative species of Onychophora: *Euperipatoides rowelli* (Peripatopsidae),  
31 and *Principapillatus hitoyensis* (Peripatidae). Our behavioural analyses, in conjunction  
32 with previous data, demonstrate that both species exhibit photonegative responses to  
33 wavelengths ranging from ultraviolet to green light (370–530 nm), while  
34 electroretinograms reveal that the onychophoran eye is maximally sensitive to blue light  
35 (peak sensitivity ~480 nm). Template fits to the obtained sensitivities suggest that the  
36 onychophoran eye is monochromatic. To clarify on which type of opsin the single  
37 visual pigment is based, we localised the corresponding mRNA in the onychophoran  
38 eye and brain using *in situ* hybridization. Our data show that the *r-opsin* gene  
39 (*onychopsin*) is expressed exclusively in the photoreceptor cells of the eye, whereas the  
40 *c-opsin* mRNA is confined to optic ganglion cells and the brain. Together, our findings  
41 suggest that the onychopsin is involved in vision, whereas the c-opsin might have a  
42 photoreceptive, non-visual function in onychophorans.

43

44 **KEY WORDS:** Arthropod, Eye, Light response, Vision, Opsins, Phototaxis, Evolution

45 **INTRODUCTION**

46 Onychophorans (velvet worms) typically bear a pair of simple, ocellus-like eyes (Fig.  
47 1A,B), which are thought to be homologous with the median ocelli of arthropods  
48 (Mayer, 2006), one of their closest relatives (Giribet and Edgecombe, 2012).  
49 Accordingly, the last common ancestor of Panarthropoda (Onychophora + Tardigrada +  
50 Arthropoda) most likely possessed a pair of ocellus-like visual organs, whereas the  
51 compound eyes evolved within the arthropod lineage (Mayer, 2006; Hering et al., 2012;  
52 Hering and Mayer, 2014). While all arthropod species studied thus far have multiple  
53 rhabdomeric opsins (r-opsins) as visual pigments, their presence being a prerequisite for  
54 colour vision (reviewed by Briscoe and Chittka, 2001), transcriptomic analyses of the  
55 opsin repertoire revealed only one r-opsin gene (*onychopsin*) in five distantly related  
56 onychophoran species (Hering et al., 2012). In phylogenetic analyses, *onychopsin* forms  
57 the sister group to the visual r-opsins of arthropods, suggesting that this gene functions  
58 in onychophoran vision. However, a ciliary-type opsin (c-opsin, to which type also the  
59 visual pigments of vertebrates belong; reviewed by Porter et al., 2012), has also been  
60 reported to occur in the onychophoran eye (Eriksson et al., 2013). Hence, a detailed  
61 expression study at the cellular level seems necessary to clarify whether r- or c-type  
62 opsins, or both, are involved in onychophoran vision.

63 Behavioural studies revealed negative phototactic behaviour in two species of  
64 Peripatidae: *Epiperipatus biolleyi* (see Monge-Nájera et al., 1993), and *Principapillatus*  
65 *hitoyensis* (referred to as “*Epiperipatus cf. isthmicola*” in Hering et al., 2012).  
66 Specimens of *P. hitoyensis* showed a photonegative reaction to wavelengths ranging  
67 from 363 nm (ultraviolet, UV) to 586 nm (yellow). The sensitivity maximum ( $\alpha$ -peak)  
68 of the visual pigment in this species was therefore estimated to be in the blue-green  
69 range of the spectrum (Hering et al., 2012). However, neither the specific wavelength of  
70 the  $\alpha$ -peak nor the actual spectral sensitivity curve of the onychophoran photoreceptors  
71 is known. Moreover, it is unclear whether a photonegative reaction to the same  
72 wavelengths occurs in representatives of the second major onychophoran subgroup, the  
73 Peripatopsidae, for which quantitative data are still missing.

74 We therefore analysed the behavioural response to light and localised the  
75 expression of the r- and c-type opsins in the peripatopsid *Euperipatoides rowelli*. To  
76 identify the sensitivity maximum ( $\alpha$ -peak) of the visual pigment and to complement

77 previous data from *P. hitoyensis*, we additionally performed electrophysiological  
78 recordings from the eye in both *E. rowelli* and *P. hitoyensis*. The obtained data allow  
79 conclusions regarding the physiological properties and function of the visual system in  
80 the last common ancestor of Onychophora and Panarthropoda, respectively.

## 81 82 **RESULTS**

### 83 **Spectral sensitivity of the onychophoran eye**

84 We recorded electroretinograms (ERGs), extracellular, light-induced potential changes  
85 in the retina, from the eyes of six specimens of *E. rowelli* of both sexes and one male of  
86 *P. hitoyensis* (Fig. 2A,B). Responses to light flashes of 40 or 100 ms duration consisted  
87 of an initial hyperpolarization truncated by a depolarization (Fig. 3A,C). The half width  
88 of the response (width at half maximal hyperpolarization) exceeded 140 ms and the time  
89 to peak (time interval from stimulus onset to maximal hyperpolarization) exceeded 95  
90 ms for all tested intensities. Both values increased considerably with decreasing  
91 stimulus intensity (Fig. 3A,C). Spectral flashes with equal photon flux revealed that the  
92 dark-adapted retina was most sensitive to wavelengths around 480 nm, i.e. to the region  
93 of the spectrum perceived as blue by humans. We fitted template formulae  
94 (Govardovskii et al., 2000), which approximate the absorbance spectra of opsin-based  
95 visual pigments in invertebrates (Stavenga, 2010), to the data from each individual (Fig.  
96 3B,D) and averaged the results for different individuals of the same species. Optimal  
97 fits were obtained assuming a visual pigment with an absorbance peak at  $474 \pm 6.5$  nm  
98 (wavelength  $\lambda_{\max}$ : average  $\pm$  standard deviation; coefficient of determination:  $R^2 = 0.88$   
99  $\pm 0.03$ ) for the six specimens of *E. rowelli* and at 484 nm ( $R^2 = 0.93$ ) for one specimen  
100 of *P. hitoyensis*. When the eye was adapted to green light, responses were  
101 indistinguishable from noise level, and no other sensitivity peaks were apparent at  
102 shorter wavelengths. During recovery from green adaptation, the shape of the spectral  
103 curve continued to be similar to the curve of the dark-adapted retina (supplementary  
104 material Fig. S1).

### 105 106 **Localisation of the r- and c-type opsins in the onychophoran eye and brain**

107 To determine whether the signal obtained from the electrophysiological recordings is  
108 related to the onychophoran r- or c-type opsin, we performed fluorescence *in situ*

109 hybridization experiments on cryosections of the *E. rowelli* heads (Fig. 4A–F). Our data  
110 show that *Er-onychopsin* is expressed in the photoreceptor layer of each eye, and  
111 lacking in other tissues, including the brain (N=6; Fig. 4B–D; supplementary material  
112 Fig. S2). In contrast, *Er-c-opsin* mRNA is localised both in optic ganglion cells within  
113 the eye and in numerous neuronal somata within the brain, in particular in the ventral  
114 perikaryal layer of the protocerebrum (Fig. 4E,F; supplementary material Fig. S2). A  
115 few additional *Er-c-opsin* expressing cells are seen in the deutocerebrum and in the  
116 medullary cords (=connecting cords) linking the brain to the ventral nerve cords (Fig.  
117 4E,F). Most importantly, and in contrast to optic ganglion cells, *Er-c-opsin* mRNA is  
118 not expressed in the photoreceptor layer of the eye (Fig. 4E).

119 Our control experiments using the sense probe for *Er-onychopsin* revealed no  
120 signal within the eye, indicating that the obtained labelling using the antisense probe for  
121 *Er-onychopsin* is specific (supplementary material Fig. S2). The unspecific labelling in  
122 the cuticle lining the epidermis and pharyngeal lumen, which occurs in all our  
123 preparations, is due to autofluorescence. In contrast, applying the *Er-c-opsin* sense  
124 probe revealed a similar pattern to the *Er-c-opsin* antisense probe (supplementary  
125 material Fig. S2). The same result was obtained repeatedly in all experiments using  
126 different sense probes on cryosections of different individuals (N=4), whereas an  
127 increase of the hybridization temperature to 58 °C completely abolished the labelling in  
128 all reactions, irrespective of whether the sense or antisense probes were used.

129

### 130 **Behavioural response of onychophorans to light of different wavelengths**

131 To clarify whether *E. rowelli* shows negative phototaxis, single animals were released  
132 in a dark arena and left free to move in any direction. On directing a bright white light at  
133 their heads, the animals immediately changed walking direction away from the light  
134 source (Fig. 5A; Wilcoxon-signed-rank test:  $p < 0.001$ ), but did not veer from course in  
135 control experiments without the light stimulus (Fig. 5B).

136 To determine the sensitivity threshold of *E. rowelli*'s negative phototaxis, we used  
137 a blue light-emitting diode ( $\lambda_{\max} = 465$  nm, i.e., close to the sensitivity maximum  
138 obtained from the electroretinograms, cf. Fig. 3B). Up to 6 animals were grouped (N=7  
139 groups) and released simultaneously in one half of a dark arena, after which this half  
140 was illuminated with blue light of four different intensities ( $3 \times 10^{11}$ ,  $6 \times 10^{11}$ ,  $9 \times 10^{11}$ ,

141  $12 \times 10^{11}$  photons  $\text{cm}^{-2} \text{s}^{-1}$ , measured at the bottom of the arena) and the behaviour of the  
142 animals was then recorded for 5 minutes. In our setup, no significant reaction to blue  
143 light was evident after an illumination with  $3 \times 10^{11}$  photons  $\text{cm}^{-2} \text{s}^{-1}$  and avoidance  
144 behaviour first occurred at  $6 \times 10^{11}$  photons  $\text{cm}^{-2} \text{s}^{-1}$  (Fig. 5C). Hence, to evaluate  
145 reactions to wavelengths outside the sensitivity maximum, the stimulus was delivered at  
146 twice the intensity of this value (i.e.,  $12 \times 10^{11}$  photons  $\text{cm}^{-2} \text{s}^{-1}$ ) in subsequent  
147 experiments.

148 To determine whether or not a shorter exposure to light would affect the  
149 significance of our results, we compared the animal's reaction to a 5, 3, 2, and 1 minute  
150 long illumination, respectively (supplementary material Fig. S3). The data show that  
151 illumination for 1 minute is sufficient to elicit a highly significant avoidance reaction.  
152 However, since about one third of all our animals did not respond to the 1-minute  
153 stimulus, we selected an illumination duration of 2 min for the remaining experiments  
154 (Fig. 5C).

155 For our major experiments, we again released groups of up to 6 animals ( $N=15$   
156 groups) in one half of the dark arena, which was then illuminated with quasi-  
157 monochromatic light of six different wavelengths of the same intensity ( $12 \times 10^{11}$   
158 photons  $\text{cm}^{-2} \text{s}^{-1}$ ). In these experiments, *E. rowelli* specimens significantly evaded  
159 wavelengths ranging from UV to green light ( $p < 0.001$ ; Friedman-test with Dunn's post-  
160 test) but showed no evasive reaction to light of longer wavelengths ( $p_{591} = 0.343$ ,  
161  $p_{631} = 0.650$ ; Friedman-test with Dunn's post-test) (Fig. 6A). In a final set of  
162 experiments, we tested our specimens for potentially positive phototaxis, as it is  
163 unknown whether or not they show preference for a particular wavelength. For these  
164 experiments, we used the same setting and released the animals in one half of the dark  
165 arena, but illuminated the other half with light of each of the six wavelengths,  
166 respectively. The obtained data gave no indication that the animals exhibit positive  
167 phototactic behaviour (Fig 6B; Friedman-test with Dunn's post-test:  $p_{465}$  and  $p_{591} = 0.769$ ,  
168  $p_{\text{rest}} > 0.999$ ).

169

## 170 **DISCUSSION**

### 171 **Onychophorans avoid wavelengths ranging from UV to green light**

172 Our behavioural data provide evidence for negative phototaxis in the peripatopsid *E.*  
173 *rowelli*, corresponding to previous results from the peripatid *P. hitoyensis* (see Hering et  
174 al., 2012). In our tests, specimens of *E. rowelli* were not attracted by light but instead  
175 significantly avoided illumination with wavelengths ranging from UV to green light.  
176 The animals are unlikely to have reacted to heat rather than light, as there was no  
177 detectable increase of temperature in the arena even after illumination at maximum light  
178 intensity. The observed photonegative reaction is consistent with the nocturnal lifestyle  
179 and high susceptibility of onychophorans to desiccation (e.g. Manton and Ramsay,  
180 1937; Bursell and Ewer, 1950; Eakin and Westfall, 1965; Read and Hughes, 1987). This  
181 might be one of the reasons why these animals generally avoid light, as it is a potential  
182 indicator of heat and low humidity.

183 The slow response of the onychophoran photoreceptors, as evidenced by a long  
184 time to peak and broad half width of the ERG signal in both species studied, is common  
185 in nocturnal invertebrates, which typically show slower reactions to light as compared  
186 to diurnal animals. This is regarded as an adaptation to dim light conditions, as the long  
187 latency and response duration generally enhance the sensitivity of visual organs  
188 (reviewed by Warrant, 2008; Fain et al., 2010; Warrant and Dacke, 2011). According to  
189 our behavioural sensitivity tests, the threshold for negative phototaxis in *E. rowelli* lies  
190 at  $6 \times 10^{11}$  photons  $\text{cm}^{-2} \text{s}^{-1}$  for blue light. This value corresponds well to light intensities  
191 typically found on the ground of rainforests during the day (e.g. Vazquez-Yanes et al.,  
192 1990), which, again, is in line with the nocturnal lifestyle of velvet worms that usually  
193 forage for food at night and seek shelter during the day (Read and Hughes, 1987;  
194 Mesibov, 1998).

195 Previous behavioural data from the peripatid *P. hitoyensis* indicated that the  
196 maximum sensitivity in this species lies within the blue-green range of the light  
197 spectrum (Hering et al., 2012). Our results based on ERGs from the eyes of *P.*  
198 *hitoyensis* and *E. rowelli* now provide more precise values, and the estimated maxima at  
199  $\lambda_{\text{max}} = 474 \pm 6.5$  nm in *E. rowelli* and  $\lambda_{\text{max}} = 484$  nm in *P. hitoyensis* suggest that the  
200 eyes of both species are most sensitive to blue light, i.e. close to the lower limit of the  
201 previously estimated range (cf. fig. 4 in Hering et al., 2012). A maximum sensitivity to  
202 blue light is widespread among invertebrates with monochromatic vision, which might



203 be due to the maximum distribution of energy of solar radiation at about 480 nm  
204 (Menzel, 1979; Bowmaker and Hunt, 1999; Kelber and Roth, 2006).

205

206 **Onychophorans exhibit monochromatic vision with onychopsin as the only visual**  
207 **pigment**

208 The electrophysiologically determined spectral sensitivity of the dark-adapted eye could  
209 be well approximated assuming the presence of only one opsin-based visual pigment.  
210 Selectively adapting the retina to green light did not provide evidence for additional  
211 visual pigments maximally sensitive to shorter wavelengths. This finding is in line with  
212 the previous hypothesis of monochromatic vision in Onychophora, which is most likely  
213 based on an r-type opsin, the so-called onychopsin (Hering et al., 2012). However, since  
214 Eriksson et al. (2013) also detected a c-type opsin in the eye of *E. kanangrensis*, it was  
215 still debatable whether a c- or rather an r-type opsin is involved in onychophoran vision.  
216 Our *in situ* hybridization experiments in specimens of *E. rowelli* revealed *onychopsin*  
217 mRNA exclusively in the photoreceptor cell layer of the eye, but no expression in the  
218 brain (contrary to the claim of Eriksson et al., 2013) or other tissues. Conversely, we did  
219 not detect *Er-c-opsin* mRNA in the photoreceptor cells but rather in optic ganglion cells  
220 in the proximal portion of the eye as well as within the brain. In the brain, the majority  
221 of *Er-c-opsin*-positive somata occur in the ventromedian portion of the protocerebrum,  
222 but a few cell bodies are also found within the deutocerebrum. These findings, in  
223 particular the lack of *Er-c-opsin* expression in the photoreceptor cells, speak against an  
224 involvement of the c-opsin in onychophoran vision. We therefore conclude that  
225 onychopsin is most likely the only visual pigment in the onychophoran eye.

226 Although the function of the onychophoran c-opsin protein is unknown, it might  
227 be involved in non-visual, extra-ocular photoreception associated with circadian clock  
228 mechanisms (Fukada and Okano, 2002; Vigh et al., 2002; Arendt et al., 2004; Velarde  
229 et al., 2005; Shichida and Matsuyama, 2009). Notably, our expression data further  
230 indicate that the *Er-c-opsin* gene might be transcribed from both the sense and the  
231 antisense DNA strands, as our *in situ* hybridization experiments using the sense probe  
232 revealed a similar expression pattern of this gene to that using the antisense probe. The  
233 putative role of the *Er-c-opsin* antisense transcript in *E. rowelli* is unknown, but it might  
234 be involved in a self-regulation of the *Er-c-opsin* expression – a function that has been



235 suggested for other genes exhibiting antisense transcription (reviewed by Pelechano and  
236 Steinmetz, 2013).

237

## 238 **Conclusions**

239 Our electrophysiological data revealed maximum sensitivity to wavelengths around 480  
240 nm in representatives of both major onychophoran subgroups, which suggests that the  
241 spectral absorption characteristics of the onychophoran photoreceptors in the retina have  
242 remained nearly unchanged for ~350 million years, i.e., since the divergence of  
243 Peripatidae and Peripatopsidae (Murienne et al., 2014). This might be due to the  
244 generally conserved geographic distribution and lifestyle of onychophorans, which are  
245 confined to humid habitats and exhibit cryptic, nocturnal behaviour (Manton and  
246 Ramsay, 1937; Bursell and Ewer, 1950; Read and Hughes, 1987; Mesibov, 1998;  
247 Oliveira et al., 2012). In conclusion, our electrophysiological recordings, behavioural  
248 experiments, and gene expression studies suggest that the onychophoran eye contains  
249 only one visual pigment, the r-type opsin onychopsin, which is most sensitive to blue  
250 light. The c-opsin is restricted to the brain, and may function in extra-ocular  
251 photoreception. Our data thus support the hypothesis of monochromatic vision in the  
252 last common ancestor of Panarthropoda (Hering et al., 2012; Hering and Mayer, 2014).

253

## 254 **MATERIALS AND METHODS**

### 255 **Animals**

256 Two species from the two major onychophoran subgroups were studied (Fig. 1A,B):  
257 *Principapillatus hitoyensis* Oliveira et al., 2012 (Peripatidae), and *Euperipatoides*  
258 *rowelli* Reid, 1996 (Peripatopsidae). Specimens of *P. hitoyensis* were collected from  
259 leaf litter in the Reserva Biológica Hitoy Cerere (Province of Limón, Region of  
260 Talamanca, Costa Rica; 09°40'N, 83°02'W, 300 m). Specimens of *E. rowelli* were  
261 obtained from decaying logs in the Tallaganda State Forest (New South Wales,  
262 Australia; 35°26'S, 149°33'E, 954 m). Onychophorans were collected and exported  
263 under the following permits: (1) the Forestry Commission of New South Wales,  
264 Australia (permit no. SL100159); and (2) the Gerencia Manejo y Uso Sostenible de RR  
265 NN–Ministerio del Ambiente y Energia, Costa Rica (permit numbers 123-2005-SINAC  
266 and 014950). The animals were kept in plastic boxes with perforated lids as described

267 previously (Baer and Mayer, 2012). Specimens of *P. hitoyensis* were maintained at  
268 room temperature (20–24 °C), whereas those of *E. rowelli* were kept at 18 °C either in  
269 the dark (for behavioural experiments), in the dark and under day/night conditions (for  
270 gene expression studies), or under a shifted 14/10 hours day/night cycle and tested in  
271 their active night period (in electrophysiological experiments). Behavioural experiments  
272 were carried out at a normal day/night rhythm between 4 and 9 pm at 19 °C. All animal  
273 treatments complied with the Principles of Laboratory Animal Care and the German  
274 Law on the Protection of Animals.

275

### 276 **Electroretinograms**

277 To obtain ERGs, we fixed the anterior body portion of each analysed specimen to a  
278 halved, tapered pipette tip (Fig. 2A) using dental silicone (polyvinyl siloxane,  
279 PRESIDENT light body, Iso 4823; Coltène, Altstätten, Switzerland) or a combination  
280 of dental silicone and a 1:1 mixture of beeswax and resin, taking care to leave one eye  
281 and its surroundings free. In most cases, it was necessary to immobilise the animal  
282 temporarily prior to handling by a 2–3 seconds long pulse of carbon dioxide from a soda  
283 maker (Genesis, SodaStream®, Tel Aviv, Israel). The reference electrode, a chlorinated  
284 silver wire, was brought in contact with the trunk of the specimen by conducting  
285 electrode paste (Gel101, Biopac Systems Inc., Goleta, California, USA) and kept in  
286 place with paper tissue wrapped around the trunk and the pipette tip. To prevent  
287 dehydration, the tissue was soaked in saline based upon the composition of  
288 onychophoran haemolymph (Robson et al., 1966). Just posterior or dorsal to the  
289 exposed eye, the skin was thinned conically with the sharp tip of a broken razor blade.  
290 This allowed us to penetrate the integument with an electrolytically sharpened tungsten  
291 electrode for recording from the retina, while the skin closed tightly around the  
292 electrode and resealed the puncture (Fig. 2B).

293 A white light stimulus was produced by a 200 W Xenon lamp (Cermax LX175F  
294 ASB-XE-175EX, SP Spectral Products, Putnam, Connecticut, USA) and directed to the  
295 eye via the central, 400 µm-wide fibre of a forked light guide (QR400-7-SR/BX, Ocean  
296 Optics, Dunedin, Florida, USA), when two shutters (VS25S2ZM1R1 and LS6ZM2,  
297 both Uniblitz, Vincent Associates®, Rochester, New York, USA) were opened. The  
298 angular position and distance of the tip of the light guide to the eye were adjusted on a

299 goniometer such that the entire cornea was illuminated by the light beam of 16°  
300 divergence and ERG responses were maximized. Narrow-band interference filters (10–  
301 12 nm full width at half maximum; Melles Griot, Rochester, New York, USA) and  
302 neutral density filters (fused silica; also Melles Griot) could be inserted into the light  
303 path, providing spectral stimuli with equal photon flux from ultraviolet (330 nm) to red  
304 (700 nm) in 10 or 20 nm steps. All stimuli were delivered as flashes of 40 or 100 ms  
305 duration, separated by pauses of 3 or 5 s.

306 For spectral adaptation, light of a green light-emitting diode (LED) with a  
307 dominant wavelength of 521 nm and 34 nm full width at half maximum (LXHL-MM1D  
308 Green Luxeon Star, Quadica Developments Inc., Brantford, Ontario, Canada) was  
309 presented constantly throughout the experiment via the six outer fibres (each 400 µm in  
310 diameter) of the forked light guide. The combined light beam of 25° divergence  
311 provided between  $3 \times 10^{13}$  and  $2 \times 10^{16}$  photons  $\text{cm}^{-2} \text{s}^{-1}$  at the position of the eye,  
312 depending on the operating current of the LED and the distance between the cornea and  
313 the tip of the light guide.

314 Responses were amplified by a P15 AC amplifier (Natus Neurology Incorporated  
315 – Grass Technologies, Warwick, Rhode Island, USA) and sampled at 2000 Hz, digitized  
316 and saved using an NI PCIe-6251 data acquisition board and custom-made LabView  
317 scripts (both National Instruments Corporation, Austin, Texas, USA) installed on a  
318 conventional computer.

319 All experiments were carried out in a darkened Faraday cage with either the  
320 stimulus or the stimulus and the spectral adaptation light as the only light source.  
321 Adaptation periods prior to recording had to be kept to a minimum (2 to 5 minutes for  
322 spectral adaptation and 5 to 10 minutes for dark adaptation) due to the reduced viability  
323 of the animals in the setup. The spectral sensitivity under dark adaptation was measured  
324 up to 10 times, alternating between series starting with short and proceeding to long  
325 wavelengths, and series in the reverse order. Before and after each spectral series, a  
326 response-intensity (V-log I) relationship was determined to control for changes in  
327 recording quality and to establish the saturation level of responses. Initially, V-log I  
328 curves were measured with white light. When the peak sensitivity of an individual  
329 became evident, we used the available narrow-band spectral light closest to the  
330 presumed wavelength of maximal sensitivity for the V-log I. Up to three stable series in

331 both directions, i.e. six series altogether, were selected per individual and analysed  
332 using custom-made scripts in Matlab (R2012b, The MathWorks, Natick, Massachusetts,  
333 USA) as described in detail elsewhere (Telles et al., 2014). In short, the ERG was  
334 smoothed by a moving average with a window width of 0.01 s. Response amplitudes  
335 were calculated as potential changes from the baseline at stimulus onset to maximal  
336 hyperpolarization and converted into sensitivities based on the sigmoidal V-log I  
337 relationship obtained before and after each spectral series. We normalized all values to  
338 the maximal spectral sensitivity within a series and averaged series from the same  
339 individual. An established template for the absorbance of an opsin-based visual pigment  
340 (Govardovkii et al., 2000) was fitted to the entire mean spectral sensitivity curve using a  
341 non-linear least squares approach. We varied the amplitude and wavelength of the  $\alpha$   
342 peak and the amplitude of the  $\beta$  peak independently. Since the sensitivity curve for  
343 wavelengths below 390 nm was too flat to determine the wavelength of the  $\beta$  peak, we  
344 calculated it as a function of the  $\alpha$  peak as suggested elsewhere (Govardovskii et al.  
345 2000). Finally, the wavelengths of the estimated  $\alpha$  peak ( $\lambda_{\max}$ ) and the respective  
346 coefficients of determination ( $R^2$ ) were averaged for different individuals.

347

#### 348 **Fluorescence *in situ* hybridization**

349 Partial sequences spanning most of the transmembrane region of the onychophoran r-  
350 type opsin (*Er-onychopsin*, 736 nt [CDS position 497–1232 of GenBank accession  
351 JN661372]) as well as the c-type opsin (*Er-c-opsin*, 808 nt [KM189804]) were  
352 amplified from cDNA, which was obtained by reverse transcription of total RNA  
353 (TRIzol<sup>®</sup> extraction protocol) using Superscript II and DNA Pol I polymerase  
354 (Invitrogen, Carlsbad, CA, USA) according to the manufacturer's protocols. The  
355 fragments were cloned using the pGEM<sup>®</sup>-T Vector System (Promega, Madison, WI,  
356 USA) and verified by Sanger sequencing (GATC Biotech, Konstanz, Germany). The  
357 cDNA clones were amplified by a standard M13 PCR and used directly to transcribe  
358 antisense and sense digoxigenin (DIG) labelled RNA probes by using SP6 and T7 RNA  
359 Polymerase, respectively, and the DIG RNA labelling mix (Roche Diagnostics,  
360 Rotkreuz, Switzerland). Freshly dissected heads of male specimens of *Euperipatoides*  
361 *rowelli* (N=10) were embedded and immediately frozen in Tissue-Tek<sup>®</sup> O.C.T.<sup>™</sup>  
362 Compound (Sakura Finetek, Europe B.V.) and 10–16  $\mu$ m thick horizontal sections were

363 cut on a Cryostat CM3050 S (Leica Biosystems, Nussloch, Germany). The sections  
364 were mounted on SuperFrost<sup>®</sup> plus slides (Menzel GmbH, Braunschweig, Germany),  
365 dried for 30 minutes at room temperature, and fixed in 4% paraformaldehyde for  
366 another 30 minutes. After several washing steps with PBST (PBS with 0.1% Tween<sup>®</sup>  
367 20) and acetylation, the sections were pre-hybridized in hybridization buffer for 3–4  
368 hours either at 55 °C or 58 °C and then hybridized for 12–16 hours at the same  
369 temperature using ~1 ng/μl RNA probe. Hybridization was followed by multiple  
370 washing steps with saline-sodium citrate buffer (SSC with 0.1% Tween<sup>®</sup> 20). The  
371 sections were incubated for 40 minutes in TNT buffer (0.1 M TRIS-HCl, pH 7.5; 0.15  
372 M NaCl; 0.1% Tween<sup>®</sup> 20) containing 0.5% blocking reagent (PerkinElmer, Waltham,  
373 MA, USA). Anti-DIG-POD Fab-fragments (Roche Diagnostics), diluted either 1:50 or  
374 1:100 in blocking solution, were then applied to the sections, which were incubated for  
375 additional 40–60 minutes at room temperature. After several washing steps with TNT  
376 buffer, the sections were incubated for 15 minutes with fluorescein-labelled tyramide  
377 (1:50 diluted working solution of the TSA<sup>™</sup> Plus Fluorescein Fluorescence System;  
378 PerkinElmer). After counterstaining with propidium iodide for 15 minutes, the slides  
379 were mounted in Vectashield<sup>®</sup> mounting medium (Vector Laboratories, Burlingame,  
380 CA, USA) and analysed with a confocal laser-scanning microscope (Leica TCS STED;  
381 Leica Microsystems). Confocal image stacks were processed with LAS AF Lite v2.4.1  
382 (Leica Microsystems).

383

### 384 **Behavioural experiments**

385 The initial light avoidance experiments to test for negative phototaxis were performed  
386 with single specimens of *E. rowelli* (N=12) as described previously for spectral  
387 experiments on *P. hitoyensis* (see Hering et al., 2012), except that only bright white  
388 light was presented. Each animal freely moved in a circular arena and its path was  
389 recorded 5 cm before and after stimulus presentation using the freely available video  
390 analysis and modelling tool Tracker (Douglas Brown,  
391 <http://www.cabrillo.edu/~dbrown/>; v.4.05 [09/04//2013]). The paths of the animals  
392 tested were then plotted into a single diagram (Fig. 5A,B). The statistical analysis was  
393 conducted by comparing the turning angles of the animals under illumination to the

394 control runs without the stimulus by applying the Wilcoxon signed rank test (see Hering  
395 et al., 2012).

396 The remaining behavioural experiments were performed with a modified version  
397 of the setup introduced by Monge-Nájera et al. (1993) using a rectangular arena  
398 (163×93×70 mm) made of acrylic glass enclosed in black paper (Fig. 2C). A grey  
399 opaque, removable plastic plate separated the arena in two halves. One half could be  
400 illuminated by a cold light source via a double-ended light guide (Fig. 2C,D). For each  
401 experiment, the bottom of the arena was covered with a sheet of the same white paper  
402 towels that were used for maintaining the animals (Baer and Mayer, 2012). The sheet  
403 was folded three times, cut to the size of the arena and wetted with 5 ml distilled water,  
404 thus ensuring equal humidity in all experiments. No space was left between the paper  
405 towel and the border of the arena to prevent the animals from escaping under the paper  
406 towel.

407 All experiments were carried out in total darkness at  $19.3 \pm 0.6$  °C. The light  
408 stimulus was delivered by narrow-banded LEDs (Nichia Corporation, Tokushima, Japan  
409 and Avago Technologies, San José, CA, USA). The LEDs emitted no light in the  
410 infrared range, and thus generated no detectable heat. To control for the possibility of  
411 the animals' reaction to heat rather than light, the temperature at the bottom of the arena  
412 was measured after illumination for 5 minutes with each LED at maximum intensity  
413 (i.e. for the 373, 402, 465, 528, 591 and 631 nm LEDs, the maximum intensity was 40,  
414 220, 370, 130, 90 and 160 times higher than that used in our behavioural experiments,  
415 respectively). These measurements revealed no stimulus-correlated change in  
416 temperature. The stimulus was generated by the PowerLab 26T data acquisition system  
417 (AD Instruments, Dunedin, New Zealand) and equalised by using different output  
418 voltages and neutral density filters (Tinx GmbH, Eggenstein-Leopoldshafen,  
419 Germany). On- and offset of the stimulus was triggered with the Chart software (v5.5.6;  
420 AD Instruments). An infrared-sensitive camera (Sony Handycam HDR-HC7, Tokyo,  
421 Japan) was mounted above the arena to automatically record the experiments. To avoid  
422 potential bias caused by possible physical or chemical influence, such as smell, noise,  
423 heat, or mechanical vibrations, all scoring and analyses were computerised and  
424 performed with the experimenter distant from the recording arena, except when  
425 releasing the animals. Before the next trial, the entire arena was cleaned and the paper

426 towels renewed to remove any traces left by the animals. In addition, the entire setup  
427 was rotated by 90° every second day.

428 To determine the optimal duration and illumination intensity for the main  
429 behavioural experiments, 7 groups of up to 6 specimens of *E. rowelli* (34 individuals in  
430 total) were dark-adapted for 20 minutes and placed in the illuminable half of the arena.  
431 After leaving them to settle for two minutes, the plastic plate separating the two halves  
432 was removed, the light switched on and each group tested for four different intensities  
433 ( $3 \times 10^{11}$ ,  $6 \times 10^{11}$ ,  $9 \times 10^{11}$ ,  $12 \times 10^{11}$  photons  $\text{cm}^{-2} \text{s}^{-1}$ ) of the 465 nm blue light. The  
434 movements of the animals were recorded for 1, 2, 3 or 5 minutes (supplementary  
435 material Fig. S3).

436 These experiments revealed the optimal duration (2 minutes) and illumination  
437 intensity (twice the identified threshold, i.e.  $12 \times 10^{11}$  photons  $\text{cm}^{-2} \text{s}^{-1}$ ), which were then  
438 used for the major behavioural experiments. For these experiments, narrow-band lights  
439 of six different wavelengths were used:  $373 \pm 13$  nm,  $402 \text{ nm} \pm 10$  nm,  $465 \text{ nm} \pm 19$   
440 nm,  $528 \text{ nm} \pm 26$  nm,  $591 \text{ nm} \pm 14$  nm, and  $631 \text{ nm} \pm 21$  nm total width at half-  
441 maximum, respectively (Fig. 2E). Like in the preliminary tests, up to six specimens  
442 were grouped (N=15 groups, 80 animals in total), dark-adapted for 20 minutes and  
443 tested in parallel. Each group experienced one run per day. In the tests for negative  
444 phototaxis (N=15 groups in total, three trials per wavelength), the animals were placed  
445 in the illuminable half of the arena, whereas in those for positive phototaxis (N=15  
446 groups in total, one trial per wavelength) they were set in the dark half of the arena. The  
447 behaviour of the animals was recorded for 2 minutes after the light was switched on.  
448 Experiments, in which animals interacted (e.g. pushed or bit each other, or aggregated),  
449 were not analysed, and the animals were retested the following day (30 out of 410  
450 experiments, 7.3%). To exclude potential biases, the wavelength of the presented light  
451 stimulus was changed randomly every day, only precluding the use of the neighbouring  
452 wavelengths in subsequent tests.

453 In all experiments, the time each animal spent in the dark half of the arena was  
454 measured, averaged for all specimens of the group and divided by the total experimental  
455 time. This resulted in a value ranging from 0 for no avoidance to 1 for total avoidance.  
456 The obtained data were analysed using the non-parametric Friedman-test, followed by  
457 Dunn's multiple comparison test to compare each wavelength against the control runs.



458 These calculations were performed using the statistics program Prism v.6 (GraphPad  
459 Software, La Jolla, CA, USA) and plotted with Adobe Illustrator CS5.1 (Adobe  
460 Systems, San José, CA, USA).

461

#### 462 **Acknowledgements**

463 We are thankful to Noel Tait, David Rowell, Ivo de Sena Oliveira, Franziska Anni  
464 Franke, Michael Gerth, and Sandra Treffkorn for help with specimen collection, to Ivo  
465 de Sena Oliveira for help with macrophotography, to Christine Martin for assistance  
466 with confocal microscopy, to Johanna Chavez and Martin Kohler for conducting  
467 behavioural pilot experiments, to Kerstin Flieger, Matthias Gilbert and Lars Thomas for  
468 help with calibrating the behavioural setup, to Klaus Schildberger, Dan-Eric Nilsson,  
469 Eric Warrant and Thomas Labhart for providing access to various equipment, to Ronald  
470 Petie for assistance in constructing the ERG setup, to David O’Carroll for valuable  
471 advice on the electrophysiological recording technique, and to Uwe Mayer for helpful  
472 comments on the first draft of the manuscript. The staffs of the Forestry Commission of  
473 New South Wales (NSW, Australia), the Instituto Nacional de Biodiversidad (INBio,  
474 Costa Rica), and the National System of Conservation Areas (SINAC, MINAE, Costa  
475 Rica) are gratefully acknowledged for providing permits.

476

#### 477 **Competing interests**

478 The authors declare no competing interests.

479

#### 480 **Author contributions**

481 H.B., P.A.S. and G.M. designed the behavioural experiments and H.B. carried out these  
482 experiments and analysed the data. M.H. and A.K. designed the electrophysiological  
483 experiments and H.B. and M.H. performed these experiments and analysed the data.  
484 L.H. and G.M. designed the gene expression experiments and L.H. carried out these  
485 experiments. G.M. and P.A.S. provided the setup and analysing tools for the  
486 behavioural experiments and A.K. contributed the electrophysiology setup. H.B. wrote  
487 the first draft and all authors read, made comments on and approved the final  
488 manuscript.

489

490 **Funding**

491 This work was supported by grants from the Studienstiftung des deutschen Volkes  
492 [German National Merit Foundation; 186861 to H.B.]; the Emmy Noether Programme  
493 of the German Research Foundation [Ma 4147/3-1 to G.M.]; and the K. & A.  
494 Wallenberg-Foundation and the Swedish Research Council [2012–2212 to A.K.].

495

496 **Supplementary material**

497 Supplementary material available online at  
498 <http://jeb.biologists.org/lookup/suppl/doi:XXX>

## 499 REFERENCES

- 500 **Arendt, D., Tessmar-Raible, K., Snyman, H., Dorresteijn, A. W. and Wittbrodt, J.**  
 501 (2004). Ciliary photoreceptors with a vertebrate-type opsin in an invertebrate  
 502 brain. *Science* **306**, 869–871.
- 503 **Baer, A. and Mayer, G.** (2012). Comparative anatomy of slime glands in Onychophora  
 504 (velvet worms). *J. Morphol.* **273**, 1079–1088.
- 505 **Bowmaker, J. K. and Hunt, D. M.** (1999). Molecular biology of photoreceptor  
 506 spectral sensitivity. In *Adaptive Mechanisms in the Ecology of Vision*, eds. S. N.  
 507 Archer M. B. A. Djamgoz E. R. Loew J. C. Partridge and S. Vallergera), pp. 439–  
 508 462: Springer Netherlands.
- 509 **Briscoe, A. D. and Chittka, L.** (2001). The evolution of color vision in insects. *Annu.*  
 510 *Rev. Entomol.* **46**, 471–510.
- 511 **Bursell, E. and Ewer, D. W.** (1950). On the reactions to humidity of *Peripatopsis*  
 512 *moseleyi* (Wood-Mason). *J. Exp. Biol.* **26**, 335–353.
- 513 **Eakin, R. M. and Westfall, J. A.** (1965). Fine structure of the eye of peripatus  
 514 (Onychophora). *Z. Zellforsch. Mikrosk. Anat.* **68**, 278–300.
- 515 **Eriksson, B. J., Fredman, D., Steiner, G. and Schmid, A.** (2013). Characterisation  
 516 and localisation of the opsin protein repertoire in the brain and retinas of a spider  
 517 and an onychophoran. *BMC Evol. Biol.* **13**, 186.
- 518 **Fain, G. L., Hardie, R. and Laughlin, S. B.** (2010). Phototransduction and the  
 519 evolution of photoreceptors. *Curr. Biol.* **20**, R114–124.
- 520 **Fukada, Y. and Okano, T.** (2002). Circadian clock system in the pineal gland. *Mol.*  
 521 *Neurobiol.* **25**, 19–30.
- 522 **Giribet, G. and Edgecombe, G. D.** (2012). Reevaluating the arthropod tree of life.  
 523 *Annu. Rev. Entomol.* **57**, 167–186.
- 524 **Govardovkii, V. I., Fyhrquist, N., Reuter, T., Kuzmin, D. G. and Donner, K.**  
 525 (2000). In search of the visual pigment template. *Vis. Neurosci.* **17**, 509–528.
- 526 **Hering, L. and Mayer, G.** (2014). Analysis of the opsin repertoire in the tardigrade  
 527 *Hypsibius dujardini* provides insights into the evolution of opsin genes in  
 528 Panarthropoda. *Genome Biol. Evol.* **6**, 2380–2391.
- 529 **Hering, L., Henze, M. J., Kohler, M., Kelber, A., Bleidorn, C., Leschke, M., Nickel,**  
 530 **B., Meyer, M., Kircher, M., Sunnucks, P. et al.** (2012). Opsins in  
 531 Onychophora (velvet worms) suggest a single origin and subsequent  
 532 diversification of visual pigments in arthropods. *Mol. Biol. Evol.* **29**, 3451–3458.
- 533 **Kelber, A. and Roth, L. S.** (2006). Nocturnal colour vision – not as rare as we might  
 534 think. *J. Exp. Biol.* **209**, 781–788.
- 535 **Manton, S. M. and Ramsay, J. A.** (1937). Studies on the Onychophora. III. The  
 536 control of water loss in *Peripatopsis* *J. Exp. Biol.* **14**, 470–472.
- 537 **Mayer, G.** (2006). Structure and development of onychophoran eyes: What is the  
 538 ancestral visual organ in arthropods? *Arthropod. Struct. Dev.* **35**, 231–245.
- 539 **Menzel, R.** (1979). Spectral Sensitivity and Color Vision in Invertebrates. In  
 540 *Comparative Physiology and Evolution of Vision in Invertebrates*, vol. 7 / 6 / 6  
 541 A (ed. H. Autrum), pp. 503–580: Springer Berlin Heidelberg.
- 542 **Mesibov, B.** (1998). Curious, yes, but not all that rare. *Invertebrata* **11**, 6.
- 543 **Monge-Nájera, J., Barrientos, Z. and Aguilar, F.** (1993). Behavior of *Epiperipatus*  
 544 *biolleyi* (Onychophora: Peripatidae) under laboratory conditions. *Rev. Biol.*  
 545 *Trop.* **41**, 689–696.

- 546 **Murienne, J., Daniels, S. R., Buckley, T. R., Mayer, G. and Giribet, G.** (2014). A  
 547 living fossil tale of Pangean biogeography. *Proc. R. Soc. B.* **281**, 1471–2954.
- 548 **Oliveira, I. S., Read, V. M. S. J. and Mayer, G.** (2012). A world checklist of  
 549 Onychophora (velvet worms), with notes on nomenclature and status of names.  
 550 *ZooKeys* **211**, 1–70.
- 551 **Pelechano, V. and Steinmetz, L. M.** (2013). Gene regulation by antisense  
 552 transcription. *Nat. Rev. Genet.* **14**, 880–893.
- 553 **Porter, M. L., Blasic, J. R., Bok, M. J., Cameron, E. G., Pringle, T., Cronin, T. W.**  
 554 **and Robison, P. R.** (2012). Shedding new light on opsin evolution. *Proc. R.*  
 555 *Soc. B.* **279**, 3–14.
- 556 **Read, V. M. S. J. and Hughes, R. N.** (1987). Feeding behaviour and prey choice in  
 557 *Macropripatus torquatus* (Onychophora). *Proc. R. Soc. B.* **230**, 483–506.
- 558 **Robson, E. A., Lockwood, A. P. M. and Ralph, R.** (1966). Composition of the blood  
 559 in Onychophora. *Nature* **209**, 533.
- 560 **Shichida, Y. and Matsuyama, T.** (2009). Evolution of opsins and phototransduction.  
 561 *Philos. Trans. R. Soc. B Biol. Sci.* **364**, 2881–2895.
- 562 **Stavenga, D.** (2010). On visual pigment templates and the spectral shape of invertebrate  
 563 rhodopsins and metarhodopsins. *J. Comp. Physiol. A.* **196**, 869–878.
- 564 **Telles, F. J., Lind, O., Henze, M. J., Rodriguez-Girones, M. A., Goyret, J. and**  
 565 **Kelber, A.** (2014). Out of the blue: the spectral sensitivity of hummingbird  
 566 hawkmoths. *J. Comp. Physiol. A.* **200**, 537–546.
- 567 **Vazquez-Yanes, C., Orozco-Segovia, A., Rincón, E., Sánchez-Coronado, M. E.,**  
 568 **Huante, P., Toledo, J. R. and Barradas, V. L.** (1990). Light Beneath the Litter  
 569 in a Tropical Forest: Effect on Seed Germination. *Ecology* **71**, 1952–1958.
- 570 **Velarde, R. A., Sauer, C. D., O. Walden, K. K., Fahrbach, S. E. and Robertson, H.**  
 571 **M.** (2005). Pteropsin: a vertebrate-like non-visual opsin expressed in the *honey*  
 572 *bee* brain. *Insect Biochem. Mol. Biol.* **35**, 1367–1377.
- 573 **Vigh, B., Manzano, M., Zádori, A., Frank, C., Lukáts, A., Röhlich, P., Szél, A. and**  
 574 **Dávid, C.** (2002). Nonvisual photoreceptors of the deep brain, pineal organs and  
 575 retina. *Histol. Histopathol.* **17**, 555–590.
- 576 **Warrant, E.** (2008). Nocturnal Vision. In *The Senses: A Comprehensive Reference*,  
 577 eds. R. H. Masland T. D. Albright P. Dallos D. Oertel S. Firestein G. K.  
 578 Beauchamp M. C. Bushnell A. I. Basbaum J. H. Kaas and E. P. Gardner), pp.  
 579 53–86. New York: Academic Press.
- 580 **Warrant, E. and Dacke, M.** (2011). Vision and Visual Navigation in Nocturnal  
 581 Insects. *Annu. Rev. Entomol.* **56**, 239–254.

582

583

584 **FIGURE LEGENDS**

585 **Fig. 1. Position of eyes in the two onychophoran species studied, *Euperipatoides***  
 586 ***rowelli* and *Principapillatus hitoyensis*.** Both species possess a pair of simple lateral  
 587 eyes, one at the base of each antenna (arrowheads). Scale bars: 500  $\mu$ m. (A) The  
 588 peripatopsid *E. rowelli*. (B) The peripatid *P. hitoyensis*. Details in A and B are from  
 589 specimens preserved in 70% ethanol.

590

591 **Fig. 2. Experimental design of the electrophysiological and behavioural**  
 592 **experiments.** (A) Diagram of an electrophysiological preparation. The head of a  
 593 specimen is embedded in dental cement (green), so that only the area surrounding the  
 594 eye is accessible for the electrode and the light guide (light cone indicated in blue). (B)  
 595 Diagram of a sagittal section of the eye (based on a histological section from Mayer,  
 596 2006) illustrating the desired position of the electrode. Anterior is left. The electrode  
 597 does not penetrate the cornea of the eye but is inserted through the adjacent cuticle and  
 598 tissue. (C) Top view of the arena used for behavioural experiments. Only one half was  
 599 illuminated (indicated in light-blue). (D) Overview of the entire behavioural setup. (E)  
 600 Normalised emission spectra of the narrow-banded light-emitting diodes used in the  
 601 behavioural setup. Abbreviations: an, antenna; ar, arena; ca, video camera; co, cornea;  
 602 ct, connective tissue; da, dark half of the arena; dp, dermal papilla; el, electrode; ey, eye;  
 603 ia, illuminated half of the arena; le, leg; lg, light guide; og, optic ganglion cells; on,  
 604 optic neuropil; os, outer segments of photoreceptors; pl, perikaryal layer of  
 605 photoreceptors; sp, slime papilla; tr, trunk; vb, vitreous body (=lens-like structure).

606

607 **Fig. 3. Spectral sensitivity of the eye in the peripatopsid *E. rowelli* and the**  
 608 **peripatid *P. hitoyensis* determined by electroretinograms (ERGs).** (A,C) ERGs  
 609 recorded for flashes of white light with increasing intensity (upper trace) consisted of an  
 610 initial hyperpolarization truncated by a depolarization (lower trace). Response  
 611 amplitudes (insets) were calculated as potential changes from the baseline at stimulus  
 612 onset to maximal hyperpolarization. Dots represent measurements, for which no ERG is  
 613 shown. (B,D) Averaged spectral sensitivity of the eye in two individuals (mean  $\pm$   
 614 standard deviation, six measurements per data point) based on response amplitudes to  
 615 light stimuli of different wavelengths and equal photon flux. Fitting a template (grey

616 line) for the absorbance of an opsin-based visual pigment to the measurements yielded a  
617 wavelength of peak absorbance ( $\lambda_{\max}$ ) of about 480 nm with a coefficient of  
618 determination ( $R^2$ ) over 0.9 for both species.

619  
620 **Fig. 4. Expression pattern of *Er-onychopsin* and *Er-c-opsin* mRNA in the**  
621 **peripatopsid *E. rowelli* visualised using antisense probes.** Horizontal sections of  
622 heads. Anterior is up in all images. Light (A) and confocal micrographs (B–F)  
623 illustrating the results of fluorescence *in situ* hybridization experiments using antisense  
624 RNA probes which were visualized using fluorescein-labelled tyramide. DNA was  
625 stained using propidium iodide. (A) Cryosection showing the spatial relationship of the  
626 eyes to the brain (dashed line). Scale bar: 250  $\mu\text{m}$ . (B) Section at the level of the eyes  
627 demonstrating the expression of *Er-onychopsin* in the eyes but not in the brain or other  
628 tissues. Scale bar: 250  $\mu\text{m}$ . (C) Section of an eye showing that *Er-onychopsin* is  
629 expressed exclusively in the photoreceptor cell layer (arrows). The cuticle exhibits  
630 autofluorescence, which is also evident in sections labelled with the sense probe as a  
631 negative control (see supplementary material Fig. S2). Scale bar: 50  $\mu\text{m}$ . (D) Detail of  
632 the photoreceptor cell layer. *Er-onychopsin* expression is restricted to the perikarya  
633 surrounding each nucleus (arrows). Scale bar: 10  $\mu\text{m}$ . (E) Overview of *Er-c-opsin*  
634 expression in a section of the head at the level of the eyes. *Er-c-opsin* is expressed in the  
635 deutocerebrum (arrows) and in the optic ganglion cells (arrowhead) in the proximal  
636 portion of the eye (sectioned horizontally on the left side; see inset in the lower right  
637 corner for a higher magnification; scale bar: 10  $\mu\text{m}$ ). Note the lack of signal in the  
638 photoreceptor cell layer of the eye on the right side. Scale bar: 250  $\mu\text{m}$ . (F) Overview of  
639 *Er-c-opsin* expression in a section through the ventral part of the brain at the level of the  
640 mushroom bodies. *Er-c-opsin* is expressed in the median portion of the protocerebrum  
641 (arrows) and in the connecting cords linking the brain to the ventral nerve cord  
642 (arrowheads). Scale bar: 250  $\mu\text{m}$ . Inset in the lower left corner shows detail of  
643 expression in the medioventral perikaryal layer within the protocerebrum. Scale bar: 10  
644  $\mu\text{m}$ . Abbreviations: at, antennal tract; br, brain; cn, central brain neuropil; cc,  
645 connecting cord; co, cornea; de, deutocerebrum; dp, dermal papilla; ep, epidermis; ey,  
646 eye; fn, frontal brain neuropil; lu, lumen of the eye vesicle; mb, mushroom body; og,

647 optic ganglion cell layer; on, optic neuropil; pc, photoreceptor cell layer; pe, perikaryal  
648 layer of the brain; ph, pharynx; vb, vitreous body.

649

650 **Fig. 5. Light avoidance behaviour in the peripatopsid *E. rowelli*.** (A) White light:  
651 Plotted pathways of N=12 *E. rowelli* (Peripatopsidae), each tested twice (n= 24). Bright  
652 white light was presented onto the head of each animal. All animals change their  
653 walking direction and turn away from the light stimulus as compared to the control (B).  
654 The pathways of the same 12 animals are unaffected when no light was presented. The  
655 differences in turning are highly significant ( $p < 0.001$ ; Wilcoxon-signed-rank test). (C)  
656 Sensitivity threshold of *E. rowelli* under 5 and 2 minutes of blue light illumination  
657 ( $\lambda_{\max} = 465$  nm). Boxplots (N=7 groups of up to 6 animals, circles give the median,  
658 boxes the quartiles and whiskers represent 10/90 percentiles) illustrate the fraction of  
659 time spent in the dark half of the arena relative to the total time of the test. Significant  
660 avoidance reaction (\*\*  $p < 0.01$ ; Friedman-test with Dunn's post-test) occurs at an  
661 intensity of  $6 \times 10^{11}$  photons  $\text{cm}^{-2} \text{s}^{-1}$ , whereas no significant reaction is seen at  $3 \times 10^{11}$   
662  $\text{cm}^{-2} \text{s}^{-1}$  (ns,  $p = 0.570$ ; Friedman-test with Dunn's post-test).

663

664 **Fig. 6. Behavioural response to light stimuli of equal quanta of different**  
665 **wavelengths in the peripatopsid *E. rowelli*.** Groups (N=15) of up to 6 animals were  
666 stimulated for 2 minutes with a spectral light stimulus of  $12 \times 10^{11}$  photons  $\text{cm}^{-2} \text{s}^{-1}$ . In  
667 control experiments, the LEDs remained switched off. Friedman-test with Dunn's post-  
668 test was used for data analysis. Boxplots (format as in Fig. 5) illustrating the fraction of  
669 time spent in the dark half of the arena relative to the total test time. Colours symbolise  
670 the wavelengths used. (A) Animals started in the illuminated half and showed negative  
671 phototactic behaviour to the light spectrum ranging from UV to green (\*\*\*)  $p < 0.001$ ,  
672 but not to longer wavelengths ( $p_{591} = 0.343$  and  $p_{631} = 0.650$ , ns=not significant). Every  
673 group is represented by a mean of three repetitions per wavelength. Dashed line  
674 indicates the average spectral sensitivity curve for *E. rowelli* obtained from  
675 electrophysiological recordings, with the baseline adjusted to the median of the  
676 behavioural control and the maximum standardised to 1. (B) Animals started in the dark  
677 half of the arena, while the other half was illuminated. No significant difference from



678 the control is evident for any of the tested wavelengths ( $p_{465}$  and  $p_{591}=0.769$ ,  
679  $p_{\text{others}}>0.999$ ). Dashed line indicates the median of the control.

**A**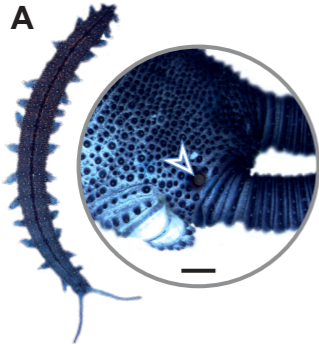**B**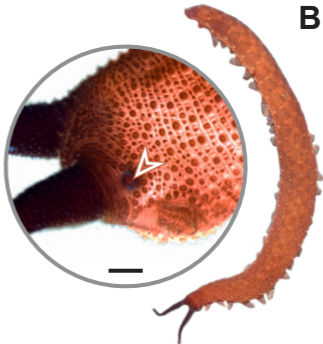

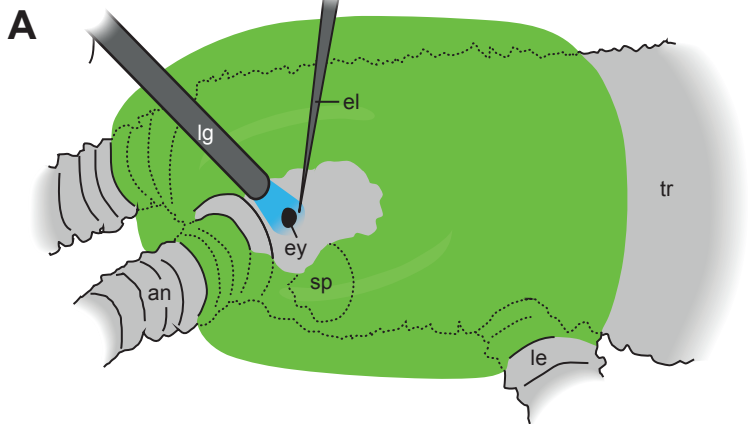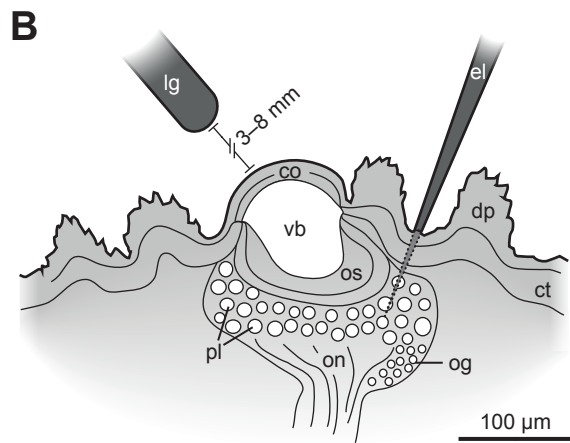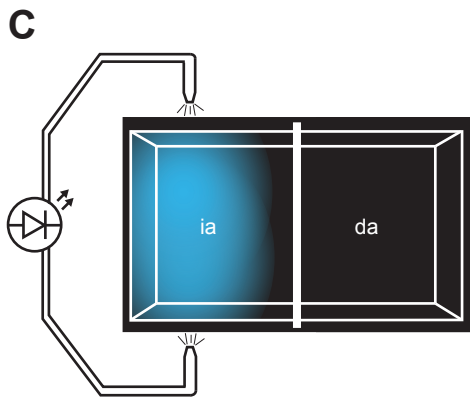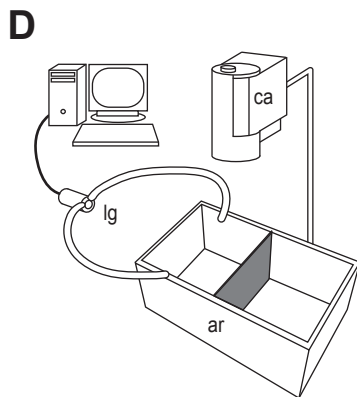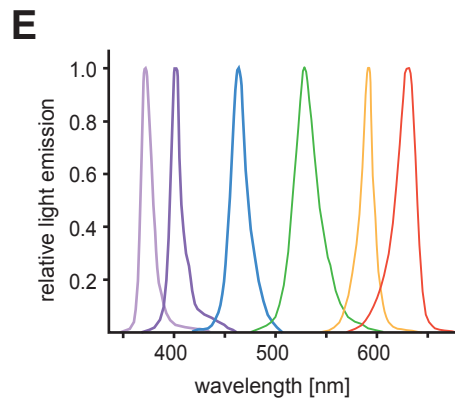

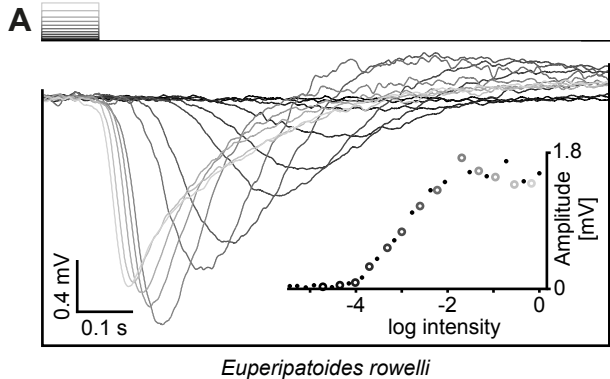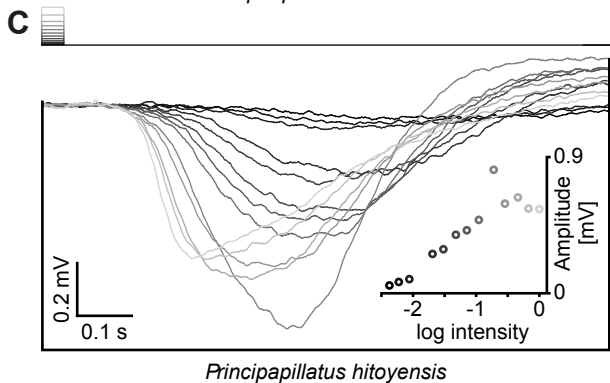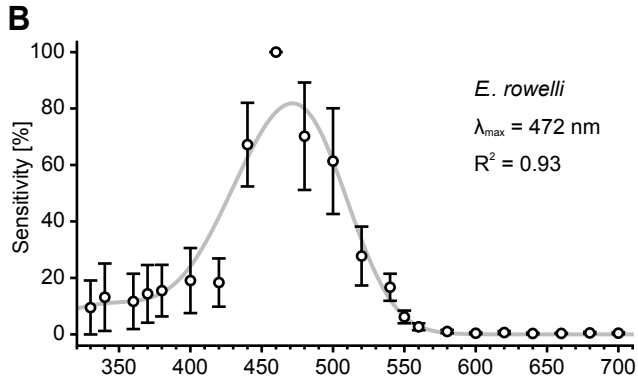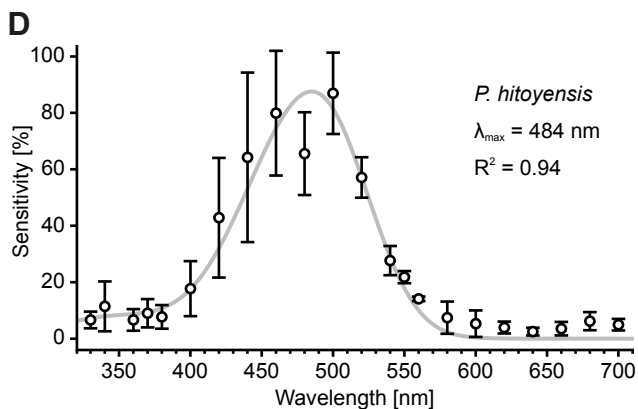

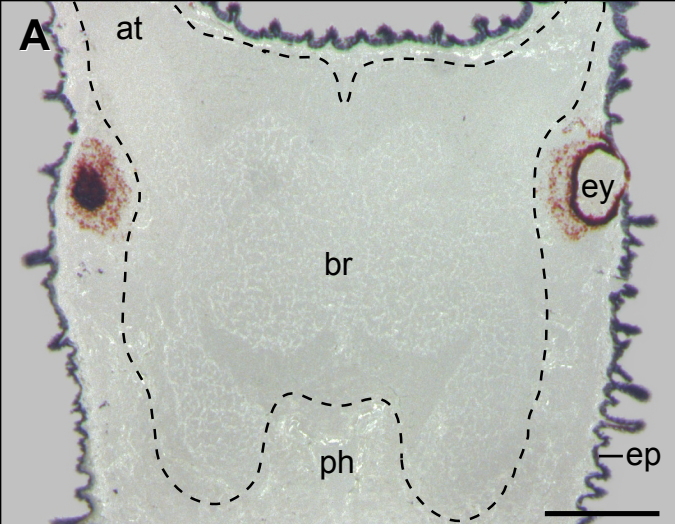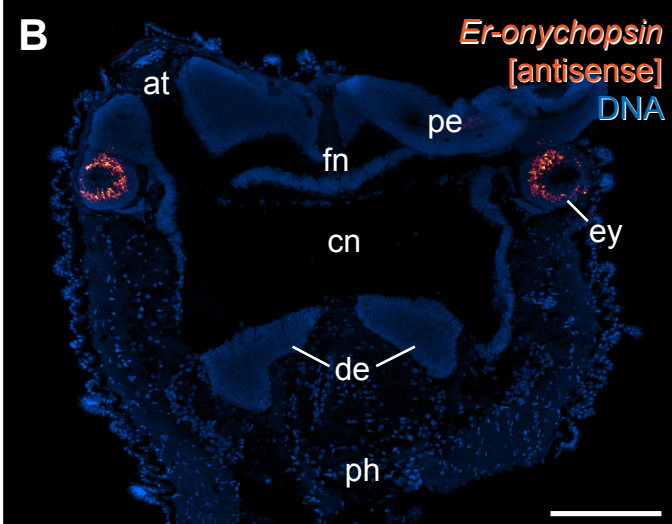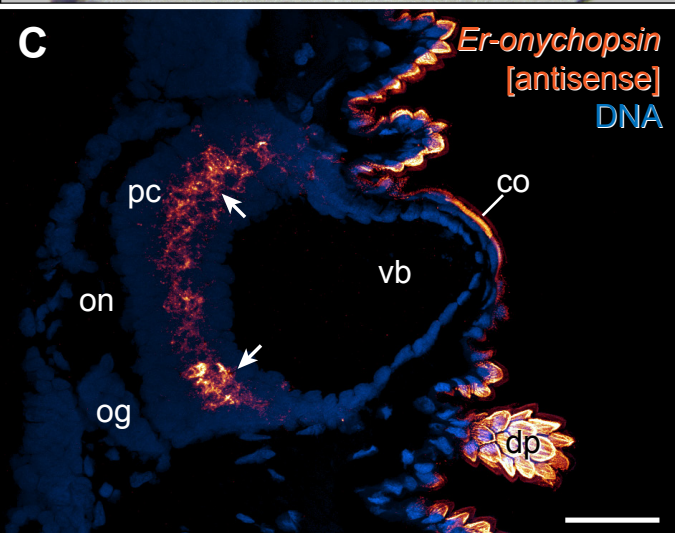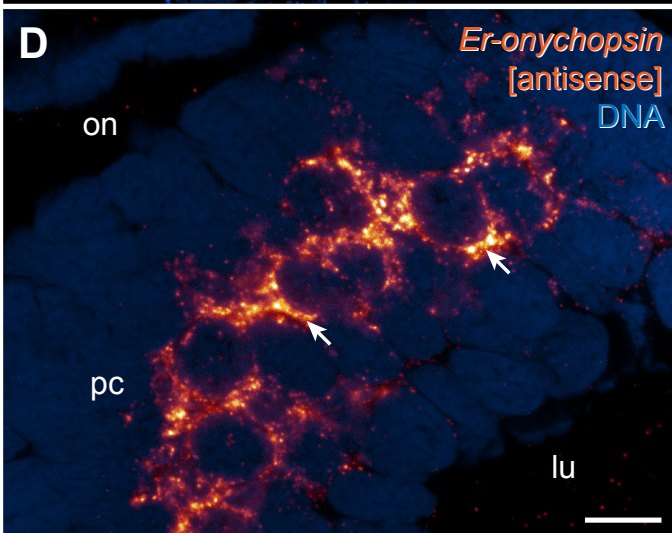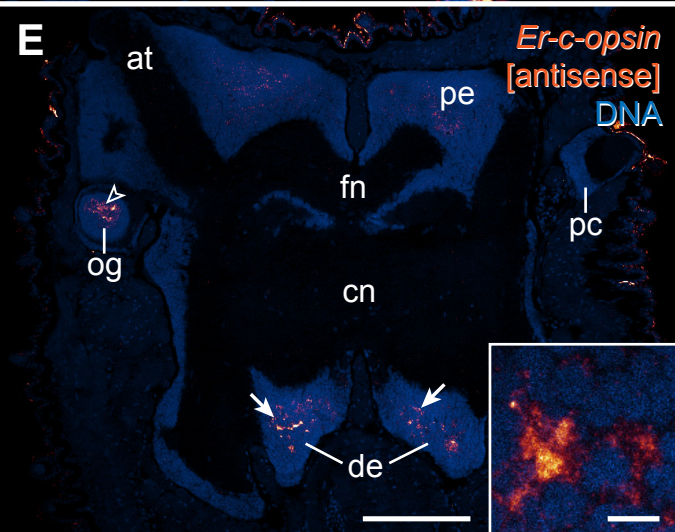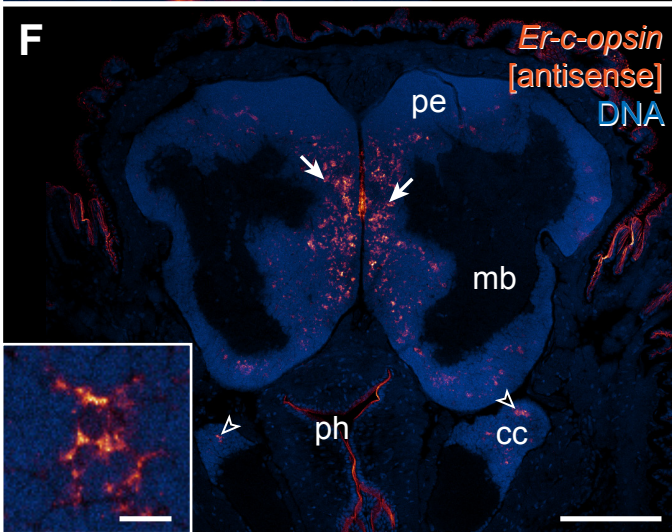

**A**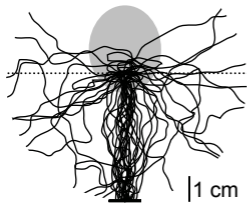

white light  
N=12, n=24

**B**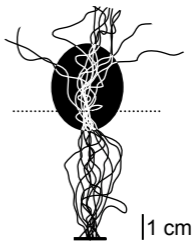

control  
N=12, n=12

**C**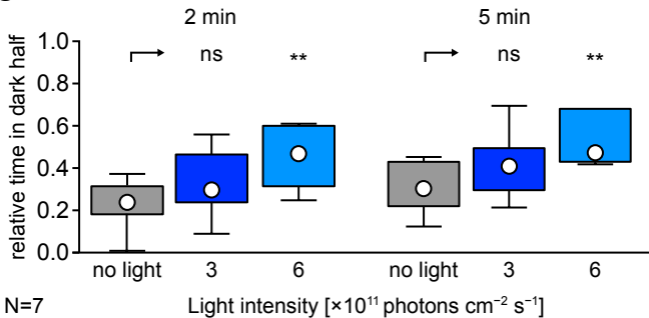

**A**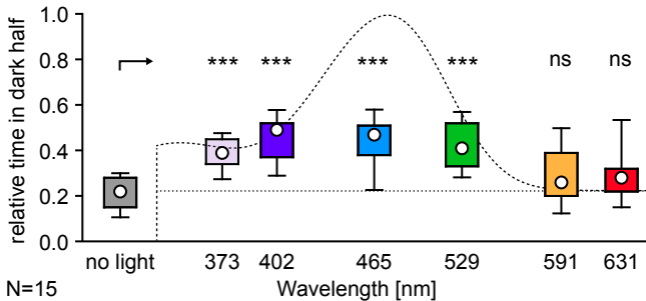**B**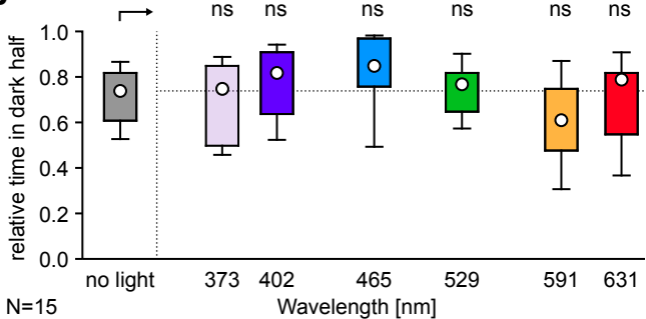

Source: https://cob.silverchair.com/jeb/article-pdf/doi/10.1242/jeb.116780/2033278/jeb_116780.pdf
